# Supplementary material for: QTL mapping and candidate gene analysis of low temperature germination in rice (Oryza sativa L.) using a genome wide association study
Source: PeerJ. 2022 May 11;10:e13407. doi: 10.7717/peerj.13407 (PMC9107303; doi:10.7717/peerj.13407)
Supplement: Supplemental Information 8 [file peerj-10-13407-s008.xlsx]

## Sheet: Sheet1
Table S1. Primers used for qRT-PCR
Gene	5'-3' (forward)	3'-5' (reverse)
Ubi	AACCAGCTGAGGCCCAAGA	ACGATTGATTTAACCAGTCCATGA
LOC_Os01g23580	GTAACACCACCGCCGCAAT	ACGAGCCCCACGAACACCTT
LOC_Os01g23590	TCGTCCAACTTCGGTTTCTCT	GATCTGTAATGCCACCCTCCA
LOC_Os01g23600	ATCGGTGGATGGGGAAGCAGA	GCCGTCACCCACGCCATATG
LOC_Os01g23610	GCGAGAGAAAAGGCTGATAAGG	TACACGAGTTCCGAGGGCA
LOC_Os01g23620	ATTGGCAGCTGTCCCGTT	GCCCTTCCCAGTTGTGAAGT
LOC_Os01g23630	ATGATGTACGGATTTGGGGA	CAACGTTCTGGGCCTTGTG
LOC_Os01g23640	TGTGAAGCGACAAATGAAGATG	CAATGGAAGACAGGAAGCAGG
LOC_Os01g23680	TCCTCCTCCTGCTGCTACCT	ACCATCTTCATGCCCATCTCT
LOC_Os01g23705	GCTGCTCAGTTGCTGTTTGG	CTTCTTCTTCTGCTCCTCCTCC
LOC_Os01g23710	GCAGCAACTACAACCACCCG	CTCGCCATCCACAAGCAA
LOC_Os01g23740	GCCAATGACAAGCGGAAGG	GGAAGAGAAGGTTGAAAGGACG
LOC_Os01g23850	CAGGCGTTTTGGAAGTGGA	CGAAGGGGACGAACAGGTAGT
LOC_Os01g23870	CTTCCGCGCCCTGGATAAA	GCACACACGGGACAGACATT
