# Supplementary material for: QTL mapping and candidate gene analysis of low temperature germination in rice (Oryza sativa L.) using a genome wide association study
Source: PeerJ. 2022 May 11;10:e13407. doi: 10.7717/peerj.13407 (PMC9107303; doi:10.7717/peerj.13407)
Supplement: Supplemental Information 9 [file peerj-10-13407-s009.xlsx]

## Sheet: Sheet1
Table S2. Rice accessions origin & classification
accession ID	re-name	origin	Group	LOC_Os01g23580 ( N as for missing site)	LOC_Os01g23620 ( N as for missing site)
IRIS_313-9111	Z1	EAS	Indica	GG	G
B017	Z2	EUR	Japonica	AG	A
IRIS_313-8177	Z3	EUR	Japonica	AG	A
IRIS_313-8109	Z4	EUR	Japonica	AG	A
IRIS_313-8111	Z5	EUR	Japonica	NG	A
IRIS_313-8141	Z6	OCE	Japonica	AG	A
IRIS_313-8142	Z7	EUR	Japonica	AG	A
IRIS_313-8095	Z8	EUR	Japonica	AG	A
IRIS_313-8147	Z9	SAC	Japonica	AG	A
IRIS_313-9886	Z11	EAR	Japonica	AG	A
IRIS_313-8167	Z12	EUR	Japonica	AG	A
IRIS_313-7696	Z13	SER-IRRI	Indica	GC	G
IRIS_313-9228	Z14	EAR	Japonica	AG	A
IRIS_313-9759	Z15	EUR	Japonica	AG	A
IRIS_313-8105	Z16	NAM	Japonica	AG	A
IRIS_313-10093	Z19	EAR	Japonica	AG	A
IRIS_313-8940	Z21	EAS	Indica	GG	G
IRIS_313-10080	Z22	EAR	Japonica	GG	G
IRIS_313-8165	Z23	EUR	Japonica	AG	A
IRIS_313-8085	Z24	EUR	Japonica	AG	A
IRIS_313-8099	Z25	EUR	Japonica	AG	A
IRIS_313-8087	Z26	EUR	Japonica	AG	A
IRIS_313-8118	Z27	EUR	Japonica	AG	A
IRIS_313-8119	Z28	EUR	Japonica	AG	A
IRIS_313-8039	Z29	EUR	Japonica	AG	A
IRIS_313-8170	Z30	EUR	Japonica	AG	A
IRIS_313-8162	Z31	EAS	Japonica	AG	A
IRIS_313-10089	Z32	EUR	Japonica	AG	A
IRIS_313-10170	Z33	EAS	Indica	GG	G
IRIS_313-10111	Z34	EUR	Japonica	AG	A
IRIS_313-8856	Z35	NAM	Japonica	AG	A
IRIS_313-10084	Z36	EUR	Japonica	AG	A
IRIS_313-9838	Z37	OCE	Japonica	AG	A
IRIS_313-10171	Z38	EAS	Indica	GG	G
IRIS_313-9253	Z39	EAS	Indica	GG	G
CX18	Z40	EAS	Indica	GG	G
CX116	Z41	EAR	Japonica	AG	A
CX329	Z42	EAS	Japonica	AG	A
B168	Z43	EAR	Japonica	AG	A
B009	Z44	SEA	Indica	GG	G
B016	Z45	EUR	Japonica	GG	G
B029	Z46	SAC	Indica	GG	G
B179	Z47	EUR	Japonica	AG	A
B182	Z48	EAR	Japonica	AG	A
B046	Z49	EAR	Japonica	AG	A
B055	Z50	OCE	Japonica	AG	A
B058	Z51	EAS	Indica	GG	G
B062	Z52	EAS	Indica	GG	G
IRIS_313-9822	Z53	SAM	Indica	GG	G
IRIS_313-8166	Z54	EUR	Japonica	AG	A
IRIS_313-10412	Z55	SER	Indica	GG	G
IRIS_313-8963	Z56	SAE	Indica	AG	G
IRIS_313-8168	Z57	EUR	Japonica	AG	A
IRIS_313-8084	Z58	EUR	Japonica	AG	A
IRIS_313-8114	Z59	EUR	Japonica	AG	A
IRIS_313-8115	Z60	EUR	Japonica	AG	A
IRIS_313-7691	Z61	SER-IRRI	Indica	GG	G
IRIS_313-8025	Z62	EUR	Japonica	AG	A
IRIS_313-8214	Z63	EUR	Japonica	AG	A
IRIS_313-8123	Z64	EUR	Japonica	AG	A
IRIS_313-8124	Z65	EUR	Japonica	AG	A
IRIS_313-8032	Z66	EUR	Japonica	AG	A
IRIS_313-8126	Z67	EUR	Japonica	AG	A
IRIS_313-8048	Z68	EUR	Japonica	AG	A
IRIS_313-8216	Z69	EUR	Japonica	AG	A
IRIS_313-8031	Z70	EUR	Japonica	AG	A
IRIS_313-8218	Z71	NAF	Japonica	AG	A
IRIS_313-8139	Z72	EUR	Japonica	AG	A
CX68	Z73	SER	Indica	GC	G
IRIS_313-10211	Z74	EAS	Indica	GG	G
IRIS_313-9730	Z75	EAS	Indica	GG	G
IRIS_313-10057	Z76	EAR	Japonica	AG	A
IRIS_313-9463	Z77	NAM	Japonica	AG	A
IRIS_313-10094	Z78	EAR	Japonica	GG	G
IRIS_313-9758	Z79	EAR	Indica	(G/A)G	G
IRIS_313-10067	Z81	EAR	Japonica	GG	G
IRIS_313-9995	Z82	EAR	Japonica	GG	G
IRIS_313-10074	Z83	EAR	Japonica	GG	G
IRIS_313-9789	Z84	EAR	Japonica	GG	G
IRIS_313-9937	Z85	EUR	Japonica	AG	A
IRIS_313-9708	Z86	EAR	Indica	GG	G
IRIS_313-9048	Z87	SAE	Japonica	AG	A
IRIS_313-8053	Z88	EUR	Japonica	AG	A
IRIS_313-10040	Z89	EAR	Indica	GG	G
IRIS_313-10274	Z90	CAM	Indica	GN	G
IRIS_313-8815	Z91	SAE	Japonica	AG	A
IRIS_313-10379	Z92	SER-IRRI	Japonica	AG	A
IRIS_313-10401	Z93	SAM	Indica	GC	G
IRIS_313-10373	Z94	SER-IRRI	Japonica	AG	A
IRIS_313-10398	Z95	SAM	Indica	GC	G
CX10	Z96	EAS	Indica	GG	G
CX28	Z97	EAR	Indica	GC	G
CX30	Z98	SER	Indica	GC	G
IRIS_313-7992	Z99	IOC	Japonica	GG	A
IRIS_313-7993	Z100	IOC	Japonica	GG	G
IRIS_313-10083	Z101	EUR	Japonica	AG	A
IRIS_313-10397	Z102	SAM	Indica	GC	G
IRIS_313-8161	Z103	SAM	Indica	GC	G
IRIS_313-8160	Z105	SAM	Japonica	AG	A
IRIS_313-8064	Z106	SAM	Japonica	AG	A
CX76	Z107	IOC	Indica	GG	G
CX247	Z109	WAF	Indica	GN	G
CX249	Z110	EAS	Indica	GC	G
CX276	Z111	SER-IRRI	Indica	GG	G
CX277	Z112	EAS	Japonica	AG	A
B059	Z113	EAS	Indica	GG	G
B104	Z114	SAE	Indica	GC	G
B039	Z115	WAF	Indica	(G/A)G	G/A
B047	Z116	EAR	Japonica	AG	N
CX280	Z117	SAM	Japonica	G(G/C)	G
CX285	Z118	EAS	Japonica	GG	G
CX330	Z119	EAR	Japonica	NG	A
CX351	Z120	EAS	Japonica	AG	A
B169	Z121	EAR	Japonica	AG	A
B170	Z122	WAS	Japonica	AG	A
B171	Z123	EUR	Japonica	AG	A
B019	Z124	CAM	Indica	(G/A)C	G
B024	Z125	SEA	Indica	GG	G
CX227	Z126	SAC	Indica	(G/A)N	G
CX233	Z127	SER-IRRI	Indica	GC	G
IRIS_313-8137	Z128	EUR	Japonica	AG	A
IRIS_313-8063	Z129	SAM	Japonica	GG	G/A
IRIS_313-7838	Z130	WAF	Japonica	AG	A
IRIS_313-8061	Z131	SAM	Japonica	AG	A
IRIS_313-8069	Z132	EUR	Indica	GC	G
IRIS_313-8072	Z133	NAM	Japonica	GG	A
IRIS_313-7856	Z134	SEA	Japonica	AG	A
IRIS_313-7863	Z135	SAM	Japonica	AG	A
IRIS_313-7665	Z136	SAM	Indica	GC	G
IRIS_313-8073	Z137	NAM	Indica	AG	G
IRIS_313-8074	Z138	OCE	Japonica	AG	A
IRIS_313-8116	Z139	EUR	Japonica	AG	A
IRIS_313-8003	Z140	SER-IRRI	Japonica	AG	A
IRIS_313-7902	Z141	SER-IRRI	Japonica	AG	A
IRIS_313-7907	Z142	SER-IRRI	Japonica	AG	A
IRIS_313-8010	Z143	SER-IRRI	Japonica	AG	A
IRIS_313-7909	Z144	SER-IRRI	Japonica	AG	A
IRIS_313-7912	Z145	WAF	Japonica	AG	A
IRIS_313-7924	Z146	SAM	Japonica	GG	G
IRIS_313-8186	Z147	NAM	Japonica	NG	A
IRIS_313-7728	Z148	IOC	Indica	AG	G
IRIS_313-8068	Z149	EUR	Indica	GC	G
IRIS_313-8076	Z150	OCE	Japonica	AG	A
IRIS_313-8046	Z151	EUR	Japonica	AG	A
IRIS_313-8202	Z152	NAM	Japonica	AG	A
IRIS_313-8132	Z153	EUR	Japonica	AG	A
IRIS_313-7766	Z154	WAF	Indica	GC	G
IRIS_313-7770	Z155	WAF	Indica	GG	G
IRIS_313-7994	Z156	IOC	Japonica	GG	G
IRIS_313-8339	Z157	NAM	Japonica	AG	A
IRIS_313-8285	Z158	NAM	Japonica	GG	A
IRIS_313-8559	Z159	SAC	Indica	GG	G
IRIS_313-8434	Z160	NAM	Japonica	AG	A
IRIS_313-9140	Z161	EAS	Japonica	AG	A
IRIS_313-9423	Z162	SER	Japonica	AG	A
IRIS_313-9066	Z163	SAE	Indica	GG	G
IRIS_313-8960	Z164	NAM	Japonica	AG	A
IRIS_313-10001	Z165	EAR	Indica	GG	G
IRIS_313-9204	Z166	EAS	Indica	GG	G
IRIS_313-9410	Z167	NAM	Japonica	AG	A
IRIS_313-10079	Z168	EAR	Japonica	GG	G
IRIS_313-8876	Z169	EUR	Japonica	GG	G
IRIS_313-10047	Z170	WAF	Indica	GG	G
IRIS_313-10178	Z171	EAS	Indica	GG	G
IRIS_313-9602	Z172	SEA	Indica	GG	G
IRIS_313-9379	Z173	EAR	Japonica	AG	A
IRIS_313-10167	Z174	SER-IRRI	Indica	GG	G
IRIS_313-8930	Z175	SAE	Indica	AG	G
IRIS_313-9727	Z176	EAS	Indica	AG	G
IRIS_313-9372	Z178	EAS	Indica	GG	G
IRIS_313-10078	Z179	EAR	Japonica	GG	G
IRIS_313-10247	Z180	CAM	Indica	GG	G
IRIS_313-8399	Z182	EUR	Japonica	AG	A
IRIS_313-8755	Z183	EAR	Japonica	AG	A
CX3	Z184	SAC	Indica	GG	G
CX44	Z185	SER-IRRI	Indica	GG	G
CX47	Z186	EAS	Japonica	AG	A
CX48	Z187	EAS	Indica	GC	G
CX79	Z188	SEA	Indica	G(G/C)	G
CX151	Z189	SER-IRRI	Japonica	GG	G
CX230	Z190	SER-IRRI	Indica	GG	G
CX237	Z191	SER	Indica	GG	G
CX241	Z192	SAM	Japonica	GG	A
CX281	Z193	SER-IRRI	Indica	GC	G
CX250	Z194	EAS	Indica	GC	G
CX113	Z195	na	Japonica	AG	A
IRIS_313-8864	Z196	SAE	Indica	AG	G
IRIS_313-8057	Z197	SAM	Japonica	AG	A
IRIS_313-8209	Z198	EUR	Japonica	AG	A
IRIS_313-8192	Z199	NAM	Japonica	AG	A
IRIS_313-8193	Z200	NAM	Japonica	AG	A
IRIS_313-10289	Z201	SAM	Indica	GG	G
IRIS_313-10333	Z202	SER	Indica	GG	G
IRIS_313-10334	Z203	SER	Indica	GG	G
IRIS_313-9482	Z204	EAS	Indica	GG	G
IRIS_313-7809	Z205	WAF	Indica	GG	G
IRIS_313-8044	Z207	EUR	Japonica	AG	A
IRIS_313-10293	Z208	CAM	Indica	GG	G
IRIS_313-10314	Z209	SAM	Indica	GG	G
IRIS_313-10374	Z210	SER-IRRI	Indica	GC	G
IRIS_313-8578	Z211	SEA	Japonica	AG	A
IRIS_313-10417	Z212	SAC	Indica	GG	G
IRIS_313-9227	Z213	SEA	Indica	GG	G
CX126	Z214	SER-IRRI	Indica	GC	G
CX80	Z215	SEA	Indica	GC	G
CX248	Z216	SER-IRRI	Japonica	AG	A
CX269	Z217	SAM	Japonica	GG	A
CX291	Z218	EAS	Indica	GC	G
CX307	Z219	EAS	Japonica	AG	A
B183	Z220	EAR	Japonica	AG	A
B049	Z221	SAC	Indica	AG	G
CX63	Z222	SAC	Indica	AG	G
B053	Z223	OCE	Japonica	NG	N
B054	Z224	OCE	Japonica	AG	A
IRIS_313-8656	Z225	SAW	Japonica	GG	G
IRIS_313-8180	Z226	NAM	Japonica	AG	A
IRIS_313-7699	Z227	SER-IRRI	Indica	GC	G
IRIS_313-8164	Z228	OCE	Japonica	AG	A
IRIS_313-9503	Z229	SER	Indica	GC	G
IRIS_313-9324	Z230	EAS	Indica	GG	G
IRIS_313-10059	Z231	EAR	Japonica	AG	A
IRIS_313-9129	Z232	SER	Japonica	AG	A
IRIS_313-10191	Z233	EAS	Indica	GG	G
IRIS_313-9081	Z234	EAR	Japonica	AG	A
IRIS_313-9940	Z235	CAM	Indica	GC	G
IRIS_313-10294	Z236	SER-IRRI	Indica	GG	N
IRIS_313-10394	Z237	SER-IRRI	Indica	GC	G
IRIS_313-10385	Z238	SER-IRRI	Indica	GG	G
IRIS_313-9522	Z239	SAC	Indica	GC	G
IRIS_313-8627	Z240	NAM	Japonica	GG	A
IRIS_313-9558	Z241	SER	Japonica	AG	A
CX58	Z242	NAF	Japonica	AG	A
CX74	Z243	SAW	Japonica	AG	A
CX75	Z244	IOC	Indica	GG	G
CX89	Z245	NAM	Indica	GG	G
CX99	Z246	SAC	Indica	GG	G
CX104	Z247	WAS	Japonica	GG	G
CX225	Z248	SER-IRRI	Indica	G(G/C)	G
CX226	Z249	SER-IRRI	Indica	GC	G
CX232	Z250	SER-IRRI	Indica	GC	G
CX240	Z251	SAM	Indica	GC	G
B035	Z252	NAM	Indica	GC	G
B180	Z253	SAM	Indica	GC	G
B038	Z254	NAF	Japonica	AG	A
B189	Z255	WAF	Japonica	AG	A
B199	Z256	EAS	Japonica	GG	G
IRIS_313-9039	Z257	IOC	Indica	GG	G
IRIS_313-9970	Z258	IOC	Indica	GC	G
CX150	Z259	SER-IRRI	Indica	GG	G
CX22	Z260	SAC	Indica	GC	G
IRIS_313-8745	Z261	CAM	Japonica	GG	G
IRIS_313-10300	Z262	SAM	Indica	GG	G
IRIS_313-10279	Z263	CAM	Indica	GG	G
IRIS_313-8444	Z264	NAM	Japonica	AG	A
CX21	Z265	IOC	Indica	AG	G
CX31	Z266	SEA	Indica	GN	G
CX45	Z267	SAC	Indica	GG	G
IRIS_313-7819	Z268	WAF	Indica	AG	G
IRIS_313-7773	Z269	WAF	Indica	GC	G
IRIS_313-10092	Z270	EAR	Japonica	AG	A
IRIS_313-9703	Z271	EAR	Japonica	AG	A
IRIS_313-9966	Z272	SAM	Indica	GC	G
IRIS_313-9611	Z273	SAC	Indica	GG	G/A
IRIS_313-10337	Z274	SER	Indica	GG	G
CX73	Z275	SER-IRRI	Indica	GC	G
CX305	Z276	EAS	Indica	GC	G
CX315	Z277	EAR	Japonica	AG	A
B027	Z278	SER-IRRI	Indica	GC	G
B194	Z279	CAM	Indica	GC	G
B077	Z280	EAS	Japonica	GG	G
IRIS_313-10221	Z282	EAS	Indica	GG	G
CX25	Z284	SER	Indica	GG	G
B048	Z286	SER	Indica	AG	G
B092	Z287	EAS	Indica	GG	G
IRIS_313-7641	Z291	SER	Indica	GG	G
IRIS_313-7807	Z293	WAF	Indica	GG	G
