# Supplementary material for: QTL mapping and candidate gene analysis of low temperature germination in rice (Oryza sativa L.) using a genome wide association study
Source: PeerJ. 2022 May 11;10:e13407. doi: 10.7717/peerj.13407 (PMC9107303; doi:10.7717/peerj.13407)
Supplement: Supplemental Information 11 [file peerj-10-13407-s011.xlsx]

## Sheet: Sheet1
Table S4. SNP density
Chr	Length	No. SNPs	SNP density /Mb
Chr1	43270923	59906	1384.44
Chr2	35937250	48765	1356.95
Chr3	36413819	43689	1199.79
Chr4	35502694	43586	1227.68
Chr5	29958434	30956	1033.3
Chr6	31248787	39461	1262.8
Chr7	29697621	36071	1214.61
Chr8	28443022	44565	1566.82
Chr9	23012720	28347	1231.8
Chr10	23207287	35432	1526.76
Chr11	29021106	47854	1648.94
Chr12	27531856	38599	1401.98
Whole	373245519	497231	1332.18
