# Supplementary material for: QTL mapping and candidate gene analysis of low temperature germination in rice (Oryza sativa L.) using a genome wide association study
Source: PeerJ. 2022 May 11;10:e13407. doi: 10.7717/peerj.13407 (PMC9107303; doi:10.7717/peerj.13407)
Supplement: Supplemental Information 12 [file peerj-10-13407-s012.xlsx]

## Sheet: Sheet1
Table S5. SNPs detected using GEMMA
TraitID	Chr	Pos	Minor allele	Major allele	MAF	-log(p)
2019D6	Chr1	12853819	T	A	0.0535055	5.75911
2019D6	Chr1	22886860	A	C	0.0525362	8.03762
2019D6	Chr1	30863565	G	A	0.0760456	5.73371
2019D6	Chr2	7138890	G	A	0.46875	5.95387
2019D6	Chr2	17812729	C	T	0.0981818	5.31458
2019D6	Chr2	20726667	T	C	0.0572034	6.19133
2019D6	Chr2	30309540	G	A	0.0714286	7.82033
2019D6	Chr3	13042992	G	A	0.0615942	5.57096
2019D6	Chr4	11864055	T	A	0.0774059	6.60608
2019D6	Chr4	19212525	C	T	0.0682657	5.14789
2019D6	Chr4	23020432	G	C	0.0545455	5.51709
2019D6	Chr5	4241728	G	A	0.0675182	6.3829
2019D6	Chr5	4970347	A	T	0.0627306	5.911
2019D6	Chr6	20322237	T	C	0.0785124	6.65521
2019D6	Chr7	12951125	G	T	0.497951	5.2723
2019D6	Chr7	28596232	A	G	0.178439	5.1808
2019D6	Chr8	685598	C	T	0.0545455	5.59374
2019D6	Chr8	16562983	A	G	0.258182	5.79996
2019D6	Chr8	25178332	T	C	0.0504032	8.52099
2019D6	Chr8	26028992	G	T	0.0652174	5.18751
2019D6	Chr9	7768731	T	C	0.0662651	6.19149
2019D6	Chr9	14350683	T	C	0.0784672	5.59659
2019D6	Chr10	5896396	T	C	0.110701	6.34392
2019D6	Chr10	9346898	A	G	0.209544	5.27101
2019D6	Chr10	23066742	A	G	0.0851449	8.49164
2019D6	Chr11	2669175	A	G	0.0719844	5.36823
2019D6	Chr11	17712316	A	G	0.0656934	6.18558
2019D6	Chr11	18655180	C	A	0.116788	5.30034
2019D7	Chr1	4170703	A	G	0.227941	5.96314
2019D7	Chr1	8947352	C	T	0.312268	6.0843
2019D7	Chr1	12808336	C	T	0.0527273	5.59496
2019D7	Chr1	13340259	T	C	0.0732601	6.09496
2019D7	Chr1	22750986	A	G	0.262082	6.26955
2019D7	Chr1	22825354	T	C	0.186131	7.1376
2019D7	Chr1	31160994	C	T	0.0658915	5.49695
2019D7	Chr1	33328196	G	A	0.246	5.51577
2019D7	Chr1	33437049	C	T	0.153137	7.19615
2019D7	Chr1	34011219	T	C	0.320513	6.6046
2019D7	Chr2	2112967	C	G	0.14781	6.13116
2019D7	Chr2	8561819	A	G	0.0885609	5.58502
2019D7	Chr3	27466254	T	C	0.0509091	5.33907
2019D7	Chr4	19212525	C	T	0.0682657	6.4518
2019D7	Chr7	10233113	T	A	0.146341	7.06409
2019D7	Chr7	14514595	T	A	0.429864	5.37478
2019D7	Chr7	14554381	A	G	0.0981481	5.37027
2019D7	Chr8	4171827	A	G	0.108614	5.19059
2019D7	Chr8	4412939	A	G	0.0529197	6.1073
2019D7	Chr8	17031472	A	G	0.309339	5.25174
2019D7	Chr9	14615553	T	C	0.278195	6.69655
2019D7	Chr10	12100113	A	G	0.256458	5.32895
2019D7	Chr10	12108593	T	C	0.199262	5.21318
2019D7	Chr11	17628947	A	G	0.162409	5.41047
2019D7	Chr11	25465925	G	A	0.0753676	5.49303
2019D7	Chr11	27143905	A	G	0.0555556	5.20889
2019D7	Chr12	3918657	C	T	0.124464	5.93003
2019D7	Chr12	9376341	A	G	0.0951493	8.52599
2019D7	Chr12	10140027	C	T	0.224453	6.32178
2019D7	Chr12	10936626	T	C	0.175824	6.15491
2019D7	Chr12	11182503	T	A	0.12253	6.53487
2019D7	Chr12	17951913	T	C	0.0731225	5.22621
2019D7	Chr12	22434994	C	G	0.0695489	5.57701
2019D8	Chr1	1494887	G	T	0.279197	5.24266
2019D8	Chr1	12647410	A	T	0.5	5.69602
2019D8	Chr1	22825354	T	C	0.186131	6.01105
2019D8	Chr1	22872607	A	T	0.266807	5.19126
2019D8	Chr2	616660	C	T	0.265455	5.42595
2019D8	Chr2	14745932	G	A	0.315985	5.50697
2019D8	Chr7	10233113	T	A	0.146341	5.42276
2019D8	Chr7	14514595	T	A	0.429864	5.39477
2019D8	Chr8	17031472	A	G	0.309339	5.44617
2019D8	Chr11	23181082	T	C	0.427632	5.23815
2019D8	Chr12	9364235	G	C	0.116788	5.46277
2019D8	Chr12	10763546	G	T	0.173664	5.18343
2019D8	Chr12	12811055	A	G	0.441729	5.56341
2019D9	Chr7	13771226	G	A	0.112727	5.34641
2019D9	Chr7	14514595	T	A	0.429864	6.35365
2019D9	Chr11	22957987	T	C	0.27533	5.17027
2019D9	Chr11	23729464	C	T	0.430435	5.62795
2019D9	Chr12	23640519	T	C	0.323413	5.6637
2019D10	Chr6	22850718	T	C	0.172161	5.3212
2019D10	Chr8	5958838	G	A	0.22	5.97801
2020D6	Chr1	13340259	T	C	0.0732601	6.32751
2020D6	Chr1	19206640	A	G	0.365455	5.85954
2020D6	Chr1	19206650	G	A	0.0656934	6.36862
2020D6	Chr1	24833598	A	G	0.0529197	5.60813
2020D6	Chr3	15369570	G	T	0.0509091	5.83552
2020D6	Chr4	2049982	G	T	0.0510949	5.857
2020D6	Chr7	1702699	T	C	0.0725191	5.62869
2020D6	Chr7	11267185	A	G	0.488281	7.27669
2020D6	Chr7	14514978	G	A	0.242647	6.43998
2020D6	Chr7	14587580	G	A	0.105556	7.99793
2020D6	Chr8	7590751	C	T	0.492647	5.7034
2020D6	Chr8	7601891	A	G	0.104015	5.22987
2020D6	Chr10	10735713	A	G	0.0507246	5.61816
2020D6	Chr11	22454341	A	G	0.355839	5.31777
2020D6	Chr12	15622081	A	G	0.0991189	5.75665
2020D7	Chr1	6361736	A	G	0.0745455	5.44196
2020D7	Chr1	13333881	C	T	0.162447	5.79083
2020D7	Chr1	13340259	T	C	0.0732601	7.83819
2020D7	Chr1	19239470	T	C	0.0618182	10.1348
2020D7	Chr1	24171446	A	G	0.0770677	6.25236
2020D7	Chr1	24833598	A	G	0.0529197	7.38954
2020D7	Chr1	24901750	T	C	0.0543478	5.43665
2020D7	Chr1	26445818	A	G	0.0654545	5.45583
2020D7	Chr1	35250579	T	C	0.0581818	8.13907
2020D7	Chr1	35430983	C	T	0.0509091	6.71839
2020D7	Chr2	20016136	T	C	0.0890909	5.56714
2020D7	Chr2	22623401	C	T	0.0583942	6.1631
2020D7	Chr2	30309540	G	A	0.0714286	7.55868
2020D7	Chr2	30312360	A	T	0.481818	7.46692
2020D7	Chr3	4489582	C	T	0.457721	5.46686
2020D7	Chr3	16384669	C	T	0.0525362	5.29005
2020D7	Chr4	283629	A	G	0.0501931	9.51104
2020D7	Chr4	1135879	T	G	0.0846774	7.28121
2020D7	Chr4	1720393	T	C	0.0981818	5.69025
2020D7	Chr4	1865977	T	C	0.237918	5.40232
2020D7	Chr4	2049982	G	T	0.0510949	5.85371
2020D7	Chr4	2471514	G	A	0.0507246	5.76885
2020D7	Chr4	2534581	T	G	0.295019	5.65055
2020D7	Chr4	2755239	T	C	0.0559846	7.16329
2020D7	Chr4	31045834	C	A	0.0545455	5.16796
2020D7	Chr6	6777096	T	C	0.0779221	5.45949
2020D7	Chr6	8381676	T	C	0.0525292	5.46736
2020D7	Chr6	9868046	T	C	0.0516529	6.44932
2020D7	Chr6	23273665	T	C	0.0606618	6.32404
2020D7	Chr6	25068062	A	G	0.0882353	5.43966
2020D7	Chr7	1702699	T	C	0.0725191	6.33056
2020D7	Chr7	14504005	G	A	0.0547445	7.96
2020D7	Chr7	14681248	T	C	0.0830258	9.63951
2020D7	Chr7	15024689	A	G	0.0512821	10.4231
2020D7	Chr7	15234034	C	T	0.0912409	5.43942
2020D7	Chr7	15713202	A	G	0.063197	9.38854
2020D7	Chr8	6167751	C	T	0.476744	6.63
2020D7	Chr8	7601891	A	G	0.104015	8.95669
2020D7	Chr9	16644408	C	T	0.478182	9.7711
2020D7	Chr10	2327604	A	G	0.0842912	6.09377
2020D7	Chr11	22943812	T	C	0.056391	5.28544
2020D7	Chr11	24442663	G	A	0.0509434	5.68508
2020D7	Chr11	27090304	T	C	0.0571956	5.14972
2020D7	Chr12	453981	A	G	0.0525362	5.33506
2020D7	Chr12	1512598	T	C	0.0597826	7.271
2020D7	Chr12	10703667	A	G	0.199262	6.69439
2020D7	Chr12	10741080	T	G	0.0671937	9.50838
2020D7	Chr12	10983131	T	C	0.0580524	5.17266
2020D7	Chr12	22544897	T	C	0.0521236	5.44931
2020D8	Chr1	19206640	A	G	0.365455	5.20263
2020D8	Chr6	1257566	A	G	0.286496	5.24177
2020D8	Chr7	13267244	C	T	0.12037	6.16701
2020D8	Chr7	13741933	T	G	0.432234	5.56043
2020D8	Chr8	26010738	T	C	0.372694	5.15089
2020D8	Chr10	18586794	T	C	0.214286	5.15559
2020D8	Chr11	1170653	T	C	0.430657	6.96737
2020D9	Chr2	2671397	C	T	0.324723	5.76191
2020D9	Chr7	13258815	G	A	0.123616	5.48818
2020D9	Chr7	13531794	A	G	0.433824	5.1387
2020D9	Chr8	26010738	T	C	0.372694	5.47957
2020D9	Chr11	1170653	T	C	0.430657	6.42398
2020D10	Chr4	4166823	A	G	0.218978	5.23185
2020D10	Chr11	1170653	T	C	0.430657	5.50966
