# Supplementary material for: QTL mapping and candidate gene analysis of low temperature germination in rice (Oryza sativa L.) using a genome wide association study
Source: PeerJ. 2022 May 11;10:e13407. doi: 10.7717/peerj.13407 (PMC9107303; doi:10.7717/peerj.13407)
Supplement: Supplemental Information 13 [file peerj-10-13407-s013.xlsx]

## Sheet: Sheet1
Table S6. QTLs summarized using GEMMA
QTLs	TraitID	Chr	Peak SNP	Minor allele	Major allele	MAF	-log(p)
qLTG-G-1-1	2019D8	Chr1	1494887	G	T	0.279197	5.24266
qLTG-G-1-2	2019D7	Chr1	4170703	A	G	0.227941	5.96314
qLTG-G-1-3	2020D7	Chr1	6361736	A	G	0.0745455	5.44196
qLTG-G-1-4	2019D7	Chr1	8947352	C	T	0.312268	6.0843
qLTG-G-1-5	2019D6	Chr1	12853819	T	A	0.0535055	5.75911
qLTG-G-1-6	2019D7	Chr1	13340259	T	C	0.0732601	6.09496
qLTG-G-1-7	2020D6	Chr1	19206650	G	A	0.0656934	6.36862
qLTG-G-1-8	2020D7	Chr1	19239470	T	C	0.0618182	10.1348
qLTG-G-1-9	2019D6	Chr1	22886860	A	C	0.0525362	8.03762
qLTG-G-1-10	2020D7	Chr1	24171446	A	G	0.0770677	6.25236
qLTG-G-1-11	2020D6	Chr1	24833598	A	G	0.0529197	5.60813
qLTG-G-1-12	2020D7	Chr1	26445818	A	G	0.0654545	5.45583
qLTG-G-1-13	2019D6	Chr1	30863565	G	A	0.0760456	5.73371
qLTG-G-1-14	2019D7	Chr1	31160994	C	T	0.0658915	5.49695
qLTG-G-1-15	2019D7	Chr1	33437049	C	T	0.153137	7.19615
qLTG-G-1-16	2019D7	Chr1	34011219	T	C	0.320513	6.6046
qLTG-G-1-17	2020D7	Chr1	35250579	T	C	0.0581818	8.13907
qLTG-G-2-1	2019D8	Chr2	616660	C	T	0.265455	5.42595
qLTG-G-2-2	2019D7	Chr2	2112967	C	G	0.14781	6.13116
qLTG-G-2-3	2020D9	Chr2	2671397	C	T	0.324723	5.76191
qLTG-G-2-4	2019D6	Chr2	7138890	G	A	0.46875	5.95387
qLTG-G-2-5	2019D7	Chr2	8561819	A	G	0.0885609	5.58502
qLTG-G-2-6	2019D8	Chr2	14745932	G	A	0.315985	5.50697
qLTG-G-2-7	2019D6	Chr2	17812729	C	T	0.0981818	5.31458
qLTG-G-2-8	2020D7	Chr2	20016136	T	C	0.0890909	5.56714
qLTG-G-2-9	2019D6	Chr2	20726667	T	C	0.0572034	6.19133
qLTG-G-2-10	2020D7	Chr2	22623401	C	T	0.0583942	6.1631
qLTG-G-2-11	2019D6	Chr2	30309540	G	A	0.0714286	7.82033
qLTG-G-3-1	2020D7	Chr3	4489582	C	T	0.457721	5.46686
qLTG-G-3-2	2019D6	Chr3	13042992	G	A	0.0615942	5.57096
qLTG-G-3-3	2020D6	Chr3	15369570	G	T	0.0509091	5.83552
qLTG-G-3-4	2020D7	Chr3	16384669	C	T	0.0525362	5.29005
qLTG-G-3-5	2019D7	Chr3	27466254	T	C	0.0509091	5.33907
qLTG-G-4-1	2020D7	Chr4	283629	A	G	0.0501931	9.51104
qLTG-G-4-2	2020D7	Chr4	1135879	T	G	0.0846774	7.28121
qLTG-G-4-3	2020D7	Chr4	1720393	T	C	0.0981818	5.69025
qLTG-G-4-4	2020D6	Chr4	2049982	G	T	0.0510949	5.857
qLTG-G-4-5	2020D7	Chr4	2755239	T	C	0.0559846	7.16329
qLTG-G-4-6	2020D10	Chr4	4166823	A	G	0.218978	5.23185
qLTG-G-4-7	2019D6	Chr4	11864055	T	A	0.0774059	6.60608
qLTG-G-4-8	2019D6	Chr4	19212525	C	T	0.0682657	5.14789
qLTG-G-4-9	2019D6	Chr4	23020432	G	C	0.0545455	5.51709
qLTG-G-4-10	2020D7	Chr4	31045834	C	A	0.0545455	5.16796
qLTG-G-5-1	2019D6	Chr5	4241728	G	A	0.0675182	6.3829
qLTG-G-5-2	2019D6	Chr5	4970347	A	T	0.0627306	5.911
qLTG-G-6-1	2020D8	Chr6	1257566	A	G	0.286496	5.24177
qLTG-G-6-2	2020D7	Chr6	6777096	T	C	0.0779221	5.45949
qLTG-G-6-3	2020D7	Chr6	8381676	T	C	0.0525292	5.46736
qLTG-G-6-4	2020D7	Chr6	9868046	T	C	0.0516529	6.44932
qLTG-G-6-5	2019D6	Chr6	20322237	T	C	0.0785124	6.65521
qLTG-G-6-6	2019D10	Chr6	22850718	T	C	0.172161	5.3212
qLTG-G-6-7	2020D7	Chr6	23273665	T	C	0.0606618	6.32404
qLTG-G-6-8	2020D7	Chr6	25068062	A	G	0.0882353	5.43966
qLTG-G-7-1	2020D6	Chr7	1702699	T	C	0.0725191	5.62869
qLTG-G-7-2	2019D7	Chr7	10233113	T	A	0.146341	7.06409
qLTG-G-7-3	2020D6	Chr7	11267185	A	G	0.488281	7.27669
qLTG-G-7-4	2019D6	Chr7	12951125	G	T	0.497951	5.2723
qLTG-G-7-5	2020D8	Chr7	13267244	C	T	0.12037	6.16701
qLTG-G-7-6	2020D7	Chr7	14681248	T	C	0.0830258	9.63951
qLTG-G-7-7	2020D7	Chr7	15024689	A	G	0.0512821	10.4231
qLTG-G-7-8	2020D7	Chr7	15713202	A	G	0.063197	9.38854
qLTG-G-7-9	2019D6	Chr7	28596232	A	G	0.178439	5.1808
qLTG-G-8-1	2019D6	Chr8	685598	C	T	0.0545455	5.59374
qLTG-G-8-2	2019D7	Chr8	4171827	A	G	0.108614	5.19059
qLTG-G-8-3	2019D7	Chr8	4412939	A	G	0.0529197	6.1073
qLTG-G-8-4	2019D10	Chr8	5958838	G	A	0.22	5.97801
qLTG-G-8-5	2020D7	Chr8	6167751	C	T	0.476744	6.63
qLTG-G-8-6	2020D6	Chr8	7590751	C	T	0.492647	5.7034
qLTG-G-8-7	2019D6	Chr8	16562983	A	G	0.258182	5.79996
qLTG-G-8-8	2019D7	Chr8	17031472	A	G	0.309339	5.25174
qLTG-G-8-9	2019D6	Chr8	25178332	T	C	0.0504032	8.52099
qLTG-G-8-10	2019D6	Chr8	26028992	G	T	0.0652174	5.18751
qLTG-G-9-1	2019D6	Chr9	7768731	T	C	0.0662651	6.19149
qLTG-G-9-2	2019D6	Chr9	14350683	T	C	0.0784672	5.59659
qLTG-G-9-3	2020D7	Chr9	16644408	C	T	0.478182	9.7711
qLTG-G-10-1	2020D7	Chr10	2327604	A	G	0.0842912	6.09377
qLTG-G-10-2	2019D6	Chr10	5896396	T	C	0.110701	6.34392
qLTG-G-10-3	2019D6	Chr10	9346898	A	G	0.209544	5.27101
qLTG-G-10-4	2020D6	Chr10	10735713	A	G	0.0507246	5.61816
qLTG-G-10-5	2019D7	Chr10	12100113	A	G	0.256458	5.32895
qLTG-G-10-6	2020D8	Chr10	18586794	T	C	0.214286	5.15559
qLTG-G-10-7	2019D6	Chr10	23066742	A	G	0.0851449	8.49164
qLTG-G-11-1	2020D8	Chr11	1170653	T	C	0.430657	6.96737
qLTG-G-11-2	2019D6	Chr11	2669175	A	G	0.0719844	5.36823
qLTG-G-11-3	2019D6	Chr11	17712316	A	G	0.0656934	6.18558
qLTG-G-11-4	2019D6	Chr11	18655180	C	A	0.116788	5.30034
qLTG-G-11-5	2020D6	Chr11	22454341	A	G	0.355839	5.31777
qLTG-G-11-6	2020D7	Chr11	22943812	T	C	0.056391	5.28544
qLTG-G-11-7	2019D8	Chr11	23181082	T	C	0.427632	5.23815
qLTG-G-11-8	2019D9	Chr11	23729464	C	T	0.430435	5.62795
qLTG-G-11-9	2020D7	Chr11	24442663	G	A	0.0509434	5.68508
qLTG-G-11-10	2019D7	Chr11	25465925	G	A	0.0753676	5.49303
qLTG-G-11-11	2019D7	Chr11	27143905	A	G	0.0555556	5.20889
qLTG-G-12-1	2020D7	Chr12	453981	A	G	0.0525362	5.33506
qLTG-G-12-2	2020D7	Chr12	1512598	T	C	0.0597826	7.271
qLTG-G-12-3	2019D7	Chr12	3918657	C	T	0.124464	5.93003
qLTG-G-12-4	2019D7	Chr12	9376341	A	G	0.0951493	8.52599
qLTG-G-12-5	2019D7	Chr12	10140027	C	T	0.224453	6.32178
qLTG-G-12-6	2020D7	Chr12	10741080	T	G	0.0671937	9.50838
qLTG-G-12-7	2019D7	Chr12	11182503	T	A	0.12253	6.53487
qLTG-G-12-8	2019D8	Chr12	12811055	A	G	0.441729	5.56341
qLTG-G-12-9	2020D6	Chr12	15622081	A	G	0.0991189	5.75665
qLTG-G-12-10	2019D7	Chr12	17951913	T	C	0.0731225	5.22621
qLTG-G-12-11	2019D7	Chr12	22434994	C	G	0.0695489	5.57701
qLTG-G-12-12	2019D9	Chr12	23640519	T	C	0.323413	5.6637
