# Supplementary material for: QTL mapping and candidate gene analysis of low temperature germination in rice (Oryza sativa L.) using a genome wide association study
Source: PeerJ. 2022 May 11;10:e13407. doi: 10.7717/peerj.13407 (PMC9107303; doi:10.7717/peerj.13407)
Supplement: Supplemental Information 14 [file peerj-10-13407-s014.xlsx]

## Sheet: Sheet1
Table S7. SNPs identified in full population using FaST-LMM
TraitID	Chr	Pos	Minor allele	Major allele	MAF	-log(p)
2019D6	Chr1	12153951	A	G	0.458955	5.51131
2019D6	Chr1	13310950	T	C	0.115809	5.828
2019D6	Chr1	22886860	A	C	0.0525362	6.8529
2019D6	Chr1	35250579	T	C	0.0581818	5.23007
2019D6	Chr2	4583247	G	T	0.0839416	5.73411
2019D6	Chr2	20749806	G	A	0.0654545	6.10438
2019D6	Chr2	30309540	G	A	0.0714286	7.91273
2019D6	Chr2	30974975	T	C	0.434307	8.5406
2019D6	Chr3	24070502	A	G	0.456044	6.08726
2019D6	Chr4	20867550	A	C	0.426471	5.19944
2019D6	Chr4	23131460	T	C	0.054902	5.27446
2019D6	Chr6	20322237	T	C	0.0785124	6.06636
2019D6	Chr7	28676190	G	A	0.435897	6.32541
2019D6	Chr9	7382304	A	T	0.0842912	5.81277
2019D6	Chr9	7410218	G	C	0.183983	6.21742
2019D6	Chr10	23066742	A	G	0.0851449	6.60788
2019D6	Chr11	17712316	A	G	0.0656934	5.55262
2019D6	Chr12	1512598	T	C	0.0597826	5.4029
2019D7	Chr1	13340259	T	C	0.0732601	5.83151
2019D7	Chr12	10140027	C	T	0.224453	5.46645
2019D7	Chr12	11182503	T	A	0.12253	5.93403
2019D9	Chr12	23640519	T	C	0.323413	5.55566
2020D6	Chr1	13340259	T	C	0.0732601	8.56314
2020D6	Chr1	19239470	T	C	0.0618182	6.09173
2020D6	Chr1	24833598	A	G	0.0529197	5.59974
2020D6	Chr2	26062949	T	C	0.132841	5.53715
2020D6	Chr2	26087587	A	G	0.218254	5.32977
2020D6	Chr4	4527433	A	G	0.0514706	5.13884
2020D6	Chr7	1702699	T	C	0.0725191	6.1364
2020D6	Chr7	11338200	T	G	0.476496	5.4679
2020D6	Chr7	14514978	G	A	0.242647	5.26107
2020D6	Chr7	14587580	G	A	0.105556	6.82841
2020D6	Chr8	6167751	C	T	0.476744	5.66452
2020D6	Chr8	7601891	A	G	0.104015	5.79829
2020D7	Chr1	13340259	T	C	0.0732601	5.72969
2020D7	Chr2	26087587	A	G	0.218254	5.2972
2020D7	Chr2	26089704	C	T	0.416667	5.21186
2020D7	Chr4	4527433	A	G	0.0514706	5.3239
2020D7	Chr7	5701029	A	G	0.0659341	5.24985
2020D7	Chr11	1170653	T	C	0.430657	5.58249
2020D7	Chr12	2084623	A	G	0.454545	5.14424
2020D8	Chr2	26089704	C	T	0.416667	5.22098
2020D8	Chr4	3566435	T	C	0.291971	5.35136
2020D8	Chr4	4192136	T	C	0.261603	6.73526
2020D8	Chr7	13267244	C	T	0.12037	5.21223
2020D8	Chr11	1170653	T	C	0.430657	5.47732
2020D9	Chr4	3566435	T	C	0.291971	6.16154
2020D9	Chr4	4192136	T	C	0.261603	7.59777
2020D9	Chr12	2084623	A	G	0.454545	5.70169
2020D10	Chr1	29923602	A	G	0.0688406	5.88491
2020D10	Chr4	2756738	A	G	0.286325	5.2757
2020D10	Chr4	4033753	T	C	0.375	5.40318
2020D10	Chr4	4192136	T	C	0.261603	8.83715
2020D10	Chr12	2084623	A	G	0.454545	6.63027
