# Supplementary material for: QTL mapping and candidate gene analysis of low temperature germination in rice (Oryza sativa L.) using a genome wide association study
Source: PeerJ. 2022 May 11;10:e13407. doi: 10.7717/peerj.13407 (PMC9107303; doi:10.7717/peerj.13407)
Supplement: Supplemental Information 15 [file peerj-10-13407-s015.xlsx]

## Sheet: Sheet1
Table S8. SNPs identified in Japonica group
TraitID	Chr	Pos	Minor allele	Major allele	MAF	-log(p)
2019D6	Chr1	12868386	G	A	0.0794702	4.9269
2019D6	Chr1	35250579	T	C	0.10596	7.26072
2019D6	Chr3	16317552	C	T	0.0960265	5.34662
2019D6	Chr6	26650784	A	G	0.0993377	5.69091
2019D6	Chr7	14676176	T	A	0.162252	4.98385
2019D6	Chr7	28708822	G	A	0.0860927	6.61168
2019D6	Chr8	3505023	T	C	0.109272	4.8298
2019D6	Chr12	1246766	G	A	0.0596026	4.24588
2019D6	Chr12	6810046	A	G	0.268212	5.15456
2019D6	Chr12	10705687	A	G	0.0562914	4.1661
2019D6	Chr12	10952855	C	T	0.0529801	5.58231
2019D7	Chr2	14745932	A	G	0.443709	4.30573
2019D7	Chr4	2471514	G	A	0.0927152	5.03725
2019D7	Chr6	26650784	A	G	0.0993377	4.25406
2019D7	Chr7	28708822	G	A	0.0860927	6.3449
2019D7	Chr11	24405662	A	G	0.115894	5.05747
2019D7	Chr12	6810046	A	G	0.268212	5.42451
2019D7	Chr12	10952855	C	T	0.0529801	5.7003
2019D8	Chr2	14745932	A	G	0.443709	4.20873
2019D8	Chr11	24405662	A	G	0.115894	4.2695
2019D8	Chr12	6810046	A	G	0.268212	4.62025
2019D8	Chr12	10952855	C	T	0.0529801	4.22406
2020D6	Chr1	12868386	G	A	0.0794702	6.78112
2020D6	Chr1	24838152	C	T	0.0960265	4.68329
2020D6	Chr1	35250579	T	C	0.10596	5.13161
2020D6	Chr4	1755721	T	C	0.172185	4.77274
2020D6	Chr4	6008521	A	G	0.0529801	5.56558
2020D6	Chr6	26650784	A	G	0.0993377	4.37814
2020D6	Chr6	29378225	G	A	0.188742	4.40305
2020D6	Chr7	14517734	A	G	0.192053	5.14474
2020D6	Chr7	28708822	G	A	0.0860927	9.86438
2020D6	Chr8	6266876	G	A	0.142384	4.18803
2020D6	Chr12	6810046	A	G	0.268212	4.30779
2020D6	Chr12	10900890	A	C	0.0529801	8.82706
2020D6	Chr12	10948789	G	A	0.0860927	5.24797
2020D7	Chr1	4758125	T	C	0.34106	4.23787
2020D7	Chr1	12868386	G	A	0.0794702	4.66867
2020D7	Chr4	4166823	A	G	0.344371	4.8503
2020D7	Chr7	28708822	G	A	0.0860927	5.62882
2020D7	Chr12	10900890	A	C	0.0529801	4.54115
2020D8	Chr1	4758125	T	C	0.34106	5.0724
2020D8	Chr4	3566435	T	C	0.430464	4.70408
2020D8	Chr4	4166823	A	G	0.344371	6.09049
2020D9	Chr1	4758125	T	C	0.34106	5.30556
2020D9	Chr4	3566435	T	C	0.430464	5.22358
2020D9	Chr4	4166823	A	G	0.344371	6.45352
2020D10	Chr1	4758125	T	C	0.34106	4.62949
2020D10	Chr4	3566468	A	G	0.450331	4.89777
2020D10	Chr4	4166823	A	G	0.344371	7.00289
