# Supplementary material for: QTL mapping and candidate gene analysis of low temperature germination in rice (Oryza sativa L.) using a genome wide association study
Source: PeerJ. 2022 May 11;10:e13407. doi: 10.7717/peerj.13407 (PMC9107303; doi:10.7717/peerj.13407)
Supplement: Supplemental Information 16 [file peerj-10-13407-s016.xlsx]

## Sheet: Sheet1
Table S9. SNPs identified in Indica group
TraitID	Chr	Pos	Minor allele	Major allele	MAF	-log(p)
2019D6	Chr1	14898933	T	C	0.068	7.54297
2019D6	Chr2	2999292	A	T	0.12	4.54693
2019D6	Chr2	7138890	A	G	0.076	7.25846
2019D6	Chr2	29595564	A	G	0.088	4.97883
2019D6	Chr2	31156531	A	G	0.052	5.40782
2019D6	Chr2	35836042	A	G	0.072	4.93359
2019D6	Chr3	4311844	A	G	0.06	4.62734
2019D6	Chr3	23928002	T	G	0.064	5.84924
2019D6	Chr4	22844813	T	C	0.088	5.42796
2019D6	Chr6	7407527	A	G	0.084	5.45473
2019D6	Chr6	30038460	A	G	0.084	5.14302
2019D6	Chr7	4574123	A	G	0.06	5.46151
2019D6	Chr7	28572112	C	T	0.052	4.81793
2019D6	Chr8	19670285	T	C	0.1	5.39821
2019D6	Chr8	21501509	T	C	0.06	7.688
2019D6	Chr10	23066742	A	G	0.184	4.90409
2019D7	Chr1	22825354	T	C	0.404	4.48219
2019D7	Chr4	22909707	A	T	0.092	4.47617
2019D8	Chr1	22888090	T	C	0.356	4.69068
2019D8	Chr11	23180303	G	T	0.148	5.83835
2019D9	Chr11	3053802	T	C	0.112	4.62372
2019D9	Chr11	23180303	G	T	0.148	5.49498
2019D10	Chr1	37113285	T	C	0.236	4.67663
2019D10	Chr2	10643080	G	C	0.168	5.00443
2019D10	Chr6	13137479	A	G	0.116	4.3607
2019D10	Chr6	23133348	T	C	0.492	4.71159
2019D10	Chr6	27335333	T	C	0.052	4.90212
2019D10	Chr9	21465305	C	A	0.08	4.76896
2019D10	Chr9	22064622	C	A	0.072	4.77937
2019D10	Chr11	23180303	G	T	0.148	4.95891
2019D10	Chr12	17443521	A	C	0.068	4.57921
2020D6	Chr1	13485303	T	C	0.1	4.37911
2020D6	Chr1	13838097	C	T	0.088	4.45826
2020D6	Chr2	26098098	T	G	0.22	5.49052
2020D6	Chr2	26499697	T	C	0.288	4.57624
2020D6	Chr12	15397757	T	G	0.192	4.39106
2020D6	Chr12	22205775	T	C	0.148	4.38492
