# Supplementary material for: QTL mapping and candidate gene analysis of low temperature germination in rice (Oryza sativa L.) using a genome wide association study
Source: PeerJ. 2022 May 11;10:e13407. doi: 10.7717/peerj.13407 (PMC9107303; doi:10.7717/peerj.13407)
Supplement: Supplemental Information 17 [file peerj-10-13407-s017.xlsx]

## Sheet: Sheet1
Table S10. QTLs summarized in Japonica group
QTLs	TraitID	Chromosome	Peak SNP	P-value	reported QTLs overlapped
qLTG-1-1-1	2020D7,2020D8,2020D9,2020D10	Chr1	4758125	4.23787	qLTG1a (Fujino et al. 2015)
qLTG-1-1-2	2019D6,2020D6,2020D7	Chr1	12868386	4.9269	qCTGERM1-5 (shakiba et al. 2017)
qLTG-1-1-3	2020D6	Chr1	24838152	4.68329
qLTG-1-1-4	2019D6,2020D6	Chr1	35250579	7.26072	qLTG1b (Fujino et al. 2015)
qLTG-1-2-1	2019D7,2019D8	Chr2	14745932	4.30573	qCTS2-3 (Wang et al. 2016)
qLTG-1-3-1	2019D6	Chr3	16317552	5.34662
qLTG-1-4-1	2020D6	Chr4	1755721	4.77274	qCTGERM4-2 (shakiba et al. 2017)
qLTG-1-4-2	2019D7	Chr4	2471514	5.03725	qLTG(II)4–1 (Najeeb et al. 2020)
qLTG-1-4-3	2020D8,2020D9,2020D10	Chr4	3566468	4.89777
qLTG-1-4-4	2020D7,2020D8,2020D9,2020D10	Chr4	4166823	4.8503	qLTG(II)4–2 (Najeeb et al. 2020)
qLTG-1-4-5	2020D6	Chr4	6008521	5.56558	qCTS4-1 and qLTGS(I)4–1 (Wang et al. 2016; Najeeb et al. 2020)
qLTG-1-6-1	2019D6,2019D7,2020D6	Chr6	26650784	5.69091
qLTG-1-6-2	2020D6	Chr6	29378225	4.40305
qLTG-1-7-1	2019D6,2020D6	Chr7	14517734	5.14474
qLTG-1-7-2	2019D6,2020D7,2019D6,2020D7	Chr7	28708822	6.61168	qCTS7-5 and qCTGERM7-5 (Wang et al.2016; Shakiba et al. 2017)
qLTG-1-8-1	2019D6	Chr8	3505023	4.8298	qLTG8 (Fujino et al. 2015)
qLTG-1-8-2	2020D6	Chr8	6266876	4.18803
qLTG-1-11-1	2019D7,2019D8	Chr11	24405662	5.05747	qCTS11-9 (Wang et al. 2016)
qLTG-1-12-1	2019D6	Chr12	1246766	4.24588
qLTG-1-12-2	2019D6,2019D7,2019D8,2020D6	Chr12	6810046	5.15456
qLTG-1-12-3	2019D6,2019D7,2019D8,2020D6	Chr12	10900890	8.82706
