# Supplementary material for: QTL mapping and candidate gene analysis of low temperature germination in rice (Oryza sativa L.) using a genome wide association study
Source: PeerJ. 2022 May 11;10:e13407. doi: 10.7717/peerj.13407 (PMC9107303; doi:10.7717/peerj.13407)
Supplement: Supplemental Information 18 [file peerj-10-13407-s018.xlsx]

## Sheet: Sheet1
Table S11. QTLs summarized in Indica group
QTLs	TraitID	Chromosome	Peak SNP	P-value	reported QTLs overlapped
qLTG-2-1-1	2020D6	Chr1	13485303	4.37911	qCTGERM1-5 (shakiba et al. 2017)
qLTG-2-1-2	2020D6	Chr1	13838097	4.45826
qLTG-2-1-3	2019D6	Chr1	14898933	7.54297
qLTG-2-1-4	2019D7,2019D8	Chr1	22888090	4.69068	qCTGERM1-6 (shakiba et al. 2017)
qLTG-2-1-5	2019D10	Chr1	37113285	4.67663
qLTG-2-2-1	2019D6	Chr2	2999292	4.54693
qLTG-2-2-2	2019D6	Chr2	7138890	7.25846	qCTGERM2-2 (shakiba et al. 2017)
qLTG-2-2-3	2019D10	Chr2	10643080	5.00443
qLTG-2-2-4	2020D6	Chr2	26098098	5.49052
qLTG-2-2-5	2020D6	Chr2	26499697	4.57624
qLTG-2-2-6	2019D6	Chr2	29595564	4.97883
qLTG-2-2-7	2019D6	Chr2	31156531	5.40782
qLTG-2-2-8	2019D6	Chr2	35836042	4.93359	qCTS2-4 (Wang et al.2016)
qLTG-2-3-1	2019D6	Chr3	4311844	4.62734
qLTG-2-3-2	2019D6	Chr3	23928002	5.84924
qLTG-2-4-1	2019D6,2019D7	Chr4	22844813	5.42796
qLTG-2-6-1	2019D6	Chr6	7407527	5.45473	qLTG6b (Fujino et al. 2015)
qLTG-2-6-2	2019D10	Chr6	13137479	4.3607
qLTG-2-6-3	2019D10	Chr6	23133348	4.71159	qCTS6-5 (Wang et al.2016)
qLTG-2-6-4	2019D10	Chr6	27335333	4.90212
qLTG-2-6-5	2019D6	Chr6	30038460	5.14302	qLTG(III)6 (Najeeb et al. 2020)
qLTG-2-7-1	2019D6	Chr7	4574123	5.46151	qLTG(I)7 (Najeeb et al. 2020)
qLTG-2-7-2	2019D6	Chr7	28572112	4.81793	qCTS7-5 and qCTGERM7-5 (Wang et al.2016; Shakiba et al. 2017)
qLTG-2-8-1	2019D6	Chr8	19670285	5.39821
qLTG-2-8-2	2019D6	Chr8	21501509	7.688
qLTG-2-9-1	2019D10	Chr9	21465305	4.76896
qLTG-2-9-2	2019D10	Chr9	22064622	4.77937
qLTG-2-10-1	2019D6	Chr10	23066742	4.90409	qCTGERM10-4 (Shakiba et al. 2017)
qLTG-2-11-1	2019D9	Chr11	3053802	4.62372
qLTG-2-11-2	2019D8,2019D9,2019D10	Chr11	23180303	5.83835	qCTS11-8 and qLTG(I)11–2 (Wang et al. 2016; Najeeb et al. 2020)
qLTG-2-12-1	2020D6	Chr12	15397757	4.39106
qLTG-2-12-2	2019D10	Chr12	17443521	4.57921
qLTG-2-12-3	2020D6	Chr12	22205775	4.38492
